# Supplementary material for: The strange case of East African annual fishes: aridification correlates with diversification for a savannah aquatic group?
Source: PubMed Central journal article supplement (PMC4209228; doi:10.1186/s12862-014-0210-3), 2014-10-14
Supplement: 12862_2014_210_MOESM1_ESM.pdf [file 12862_2014_210_MOESM1_ESM.pdf]

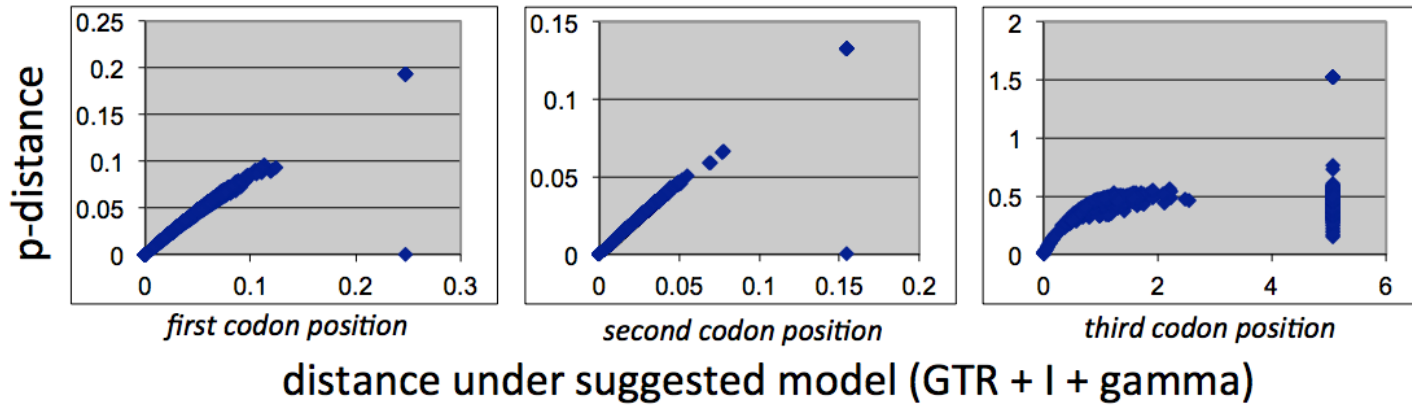

Figure S2: Distance plots showing evidence for saturation in the third position of codon in *COI* gene. The third position was therefore excluded from the analyses. The outlier points belong to outgroups.
