# Supplementary material for: The strange case of East African annual fishes: aridification correlates with diversification for a savannah aquatic group?
Source: PubMed Central journal article supplement (PMC4209228; doi:10.1186/s12862-014-0210-3), 2014-10-14
Supplement: 12862_2014_210_MOESM2_ESM.pdf [file 12862_2014_210_MOESM2_ESM.pdf]

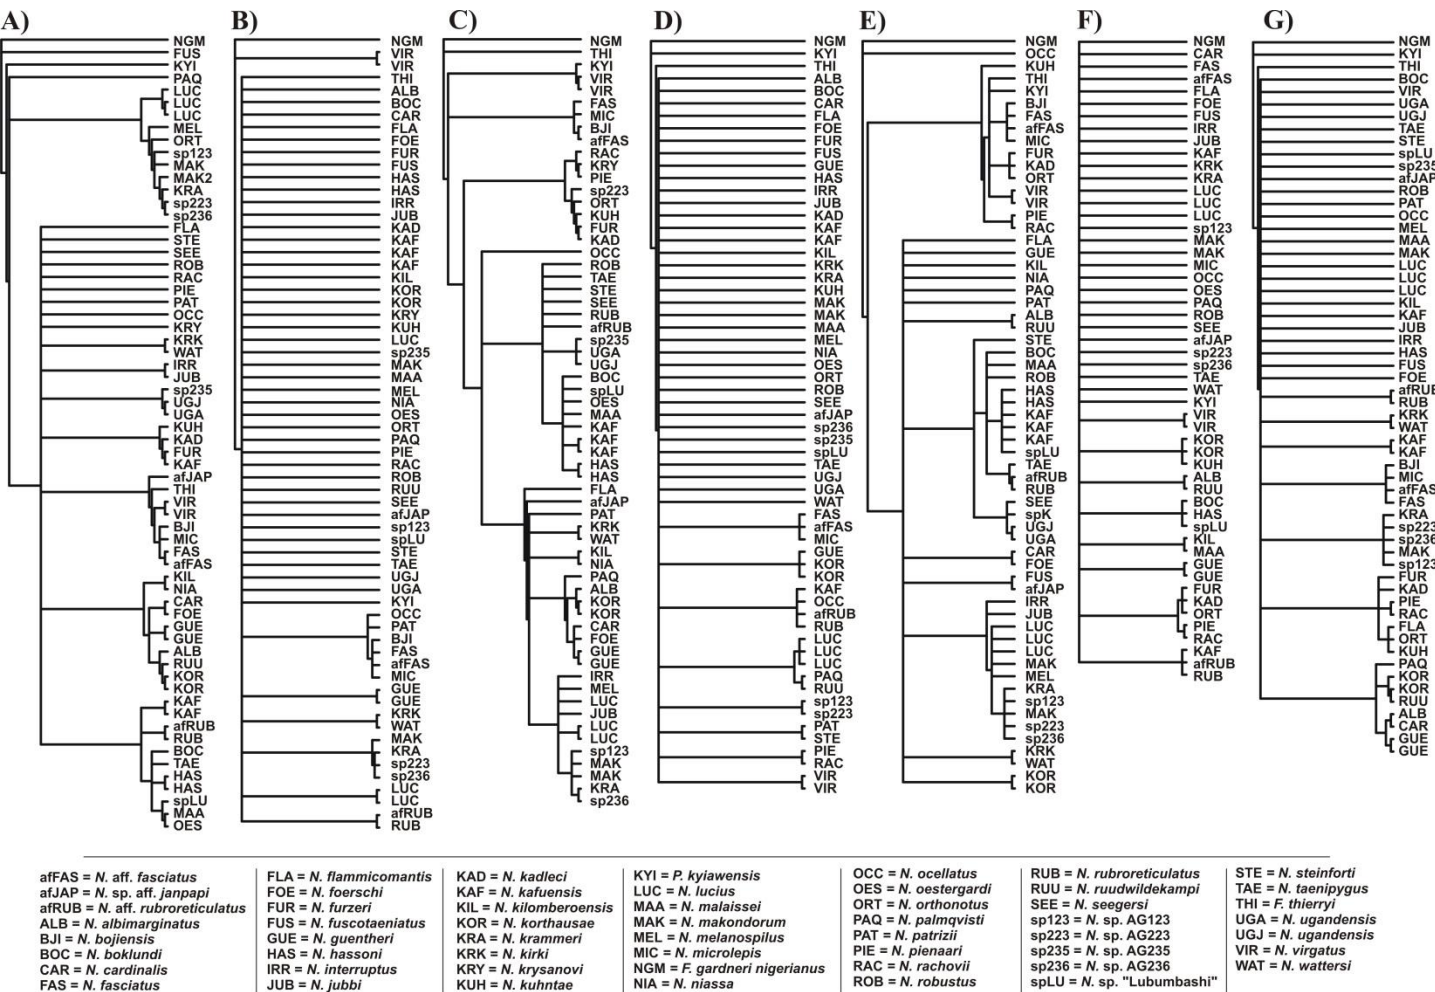

Figure S1: Results of phylogenetic analyses of individual genes. A) *COI* - all positions included, B) *COI* - only first and second position, C) *GLYT1*, D) *MYH6*, E) *SH3PX3*, F) *GPR85* and G) *ZIC1*.
