# Supplementary material for: The strange case of East African annual fishes: aridification correlates with diversification for a savannah aquatic group?
Source: PubMed Central journal article supplement (PMC4209228; doi:10.1186/s12862-014-0210-3), 2014-10-14

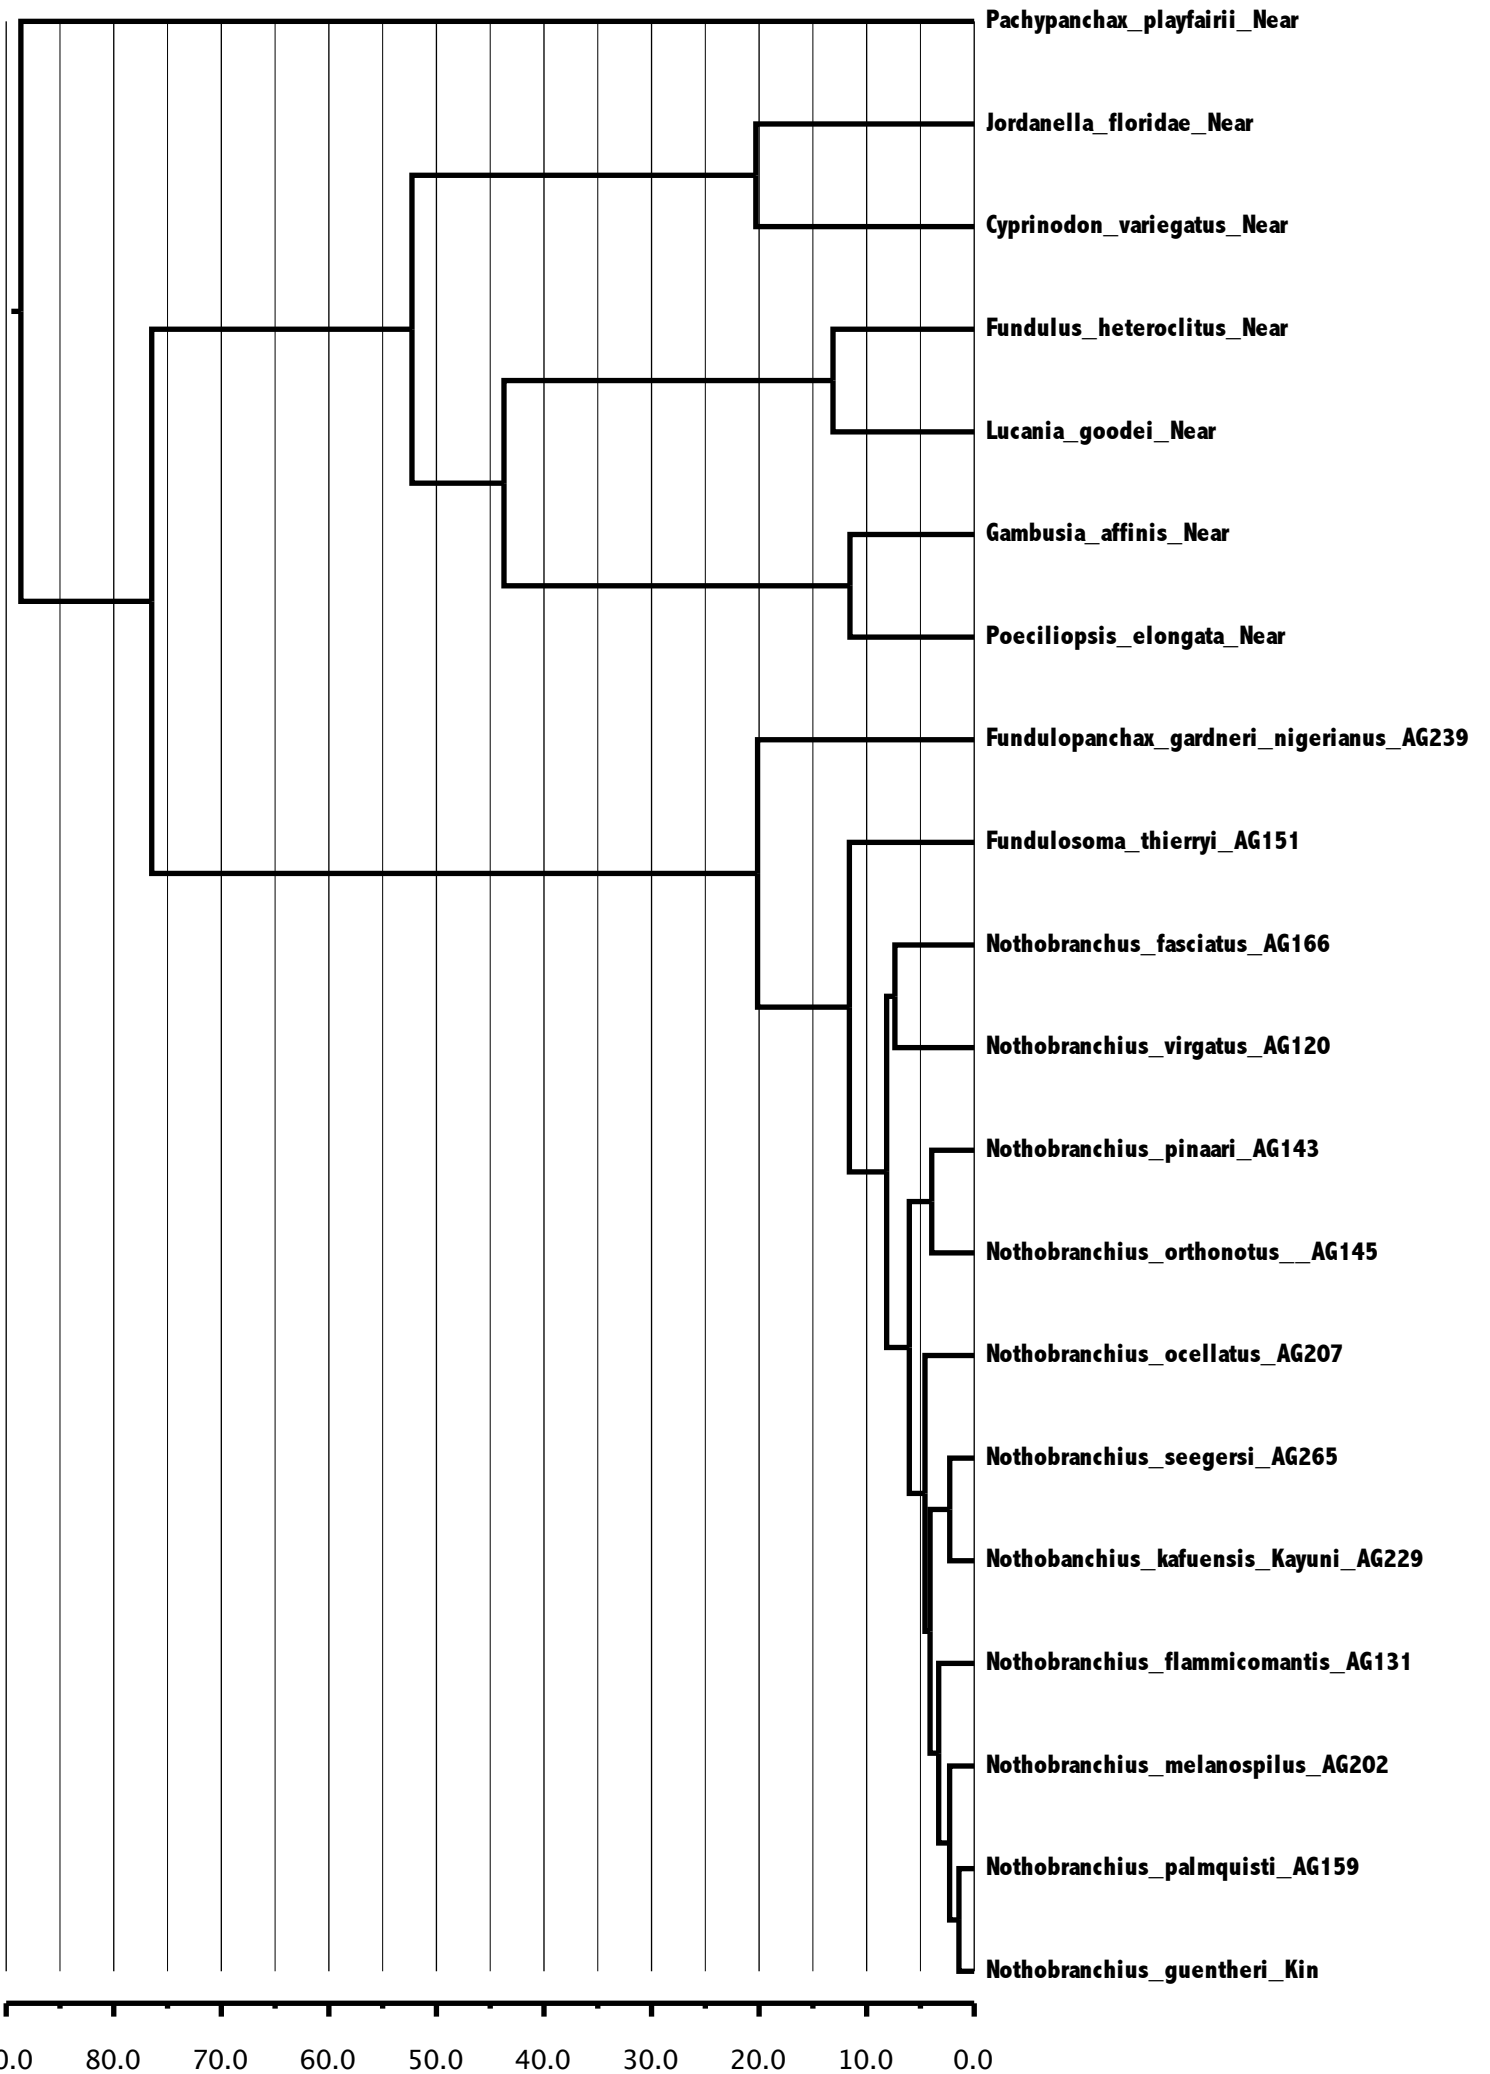

Supplement: 12862_2014_210_MOESM3_ESM.pdf [file 12862_2014_210_MOESM3_ESM.pdf]
